# Supplementary material
Source: MDPI journal article supplement (https://www.mdpi.com/2571-9408/4/3/69)
Supplement: s1 [file s1 › heritage-1289600-supplementary.pdf]

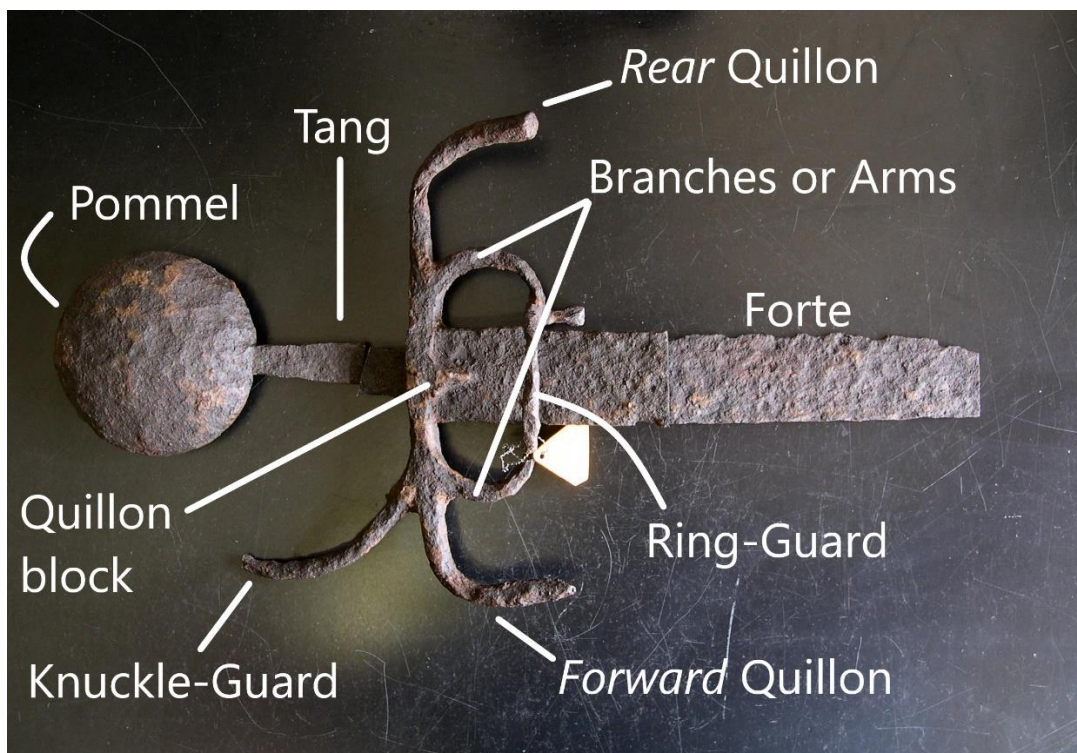

**Figure S1.** Sections of the sword-hilt.

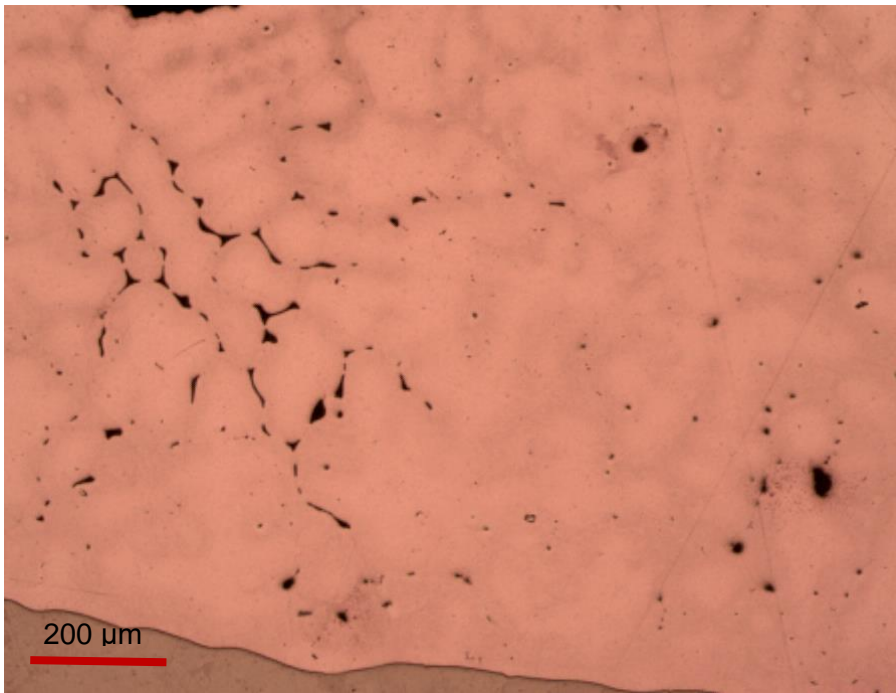

**Figure S2.** Dendritic structure of copper welding the two hemispheres of the pommel P1.

**Table S1.** Grain size of the blade G6 estimated on 200x LOM micrographs according to the different microstructure observed

| Sample    | Microstructure                                       | Grain size ( $\mu\text{m}$ ) |
|-----------|------------------------------------------------------|------------------------------|
| <b>G6</b> |                                                      |                              |
| <b>P1</b> | Pearlite and Ferrite                                 | $8.97 \pm 2.2$               |
|           | Pearlite and Ferrite Widmanstätten                   | $1.99 \pm 0.3$               |
| <b>E1</b> | Ferrite and Pearlite                                 | $15.9 \pm 4.5$               |
|           | Ferrite and Pearlite (on one side)                   | $50.1 \pm 10.2$              |
| <b>I1</b> | Ferrite                                              | $6.3 \pm 0.9$                |
|           | Ferrite and Pearlite (on an external side of sample) | $30.9 \pm 2.9$               |
|           | Ferrite and Pearlite                                 | $19.6 \pm 2.1$               |
|           | Ferrite and Pearlite                                 | $48.5 \pm 12.0$              |
|           | Pearlite and Cementite                               | $32.3 \pm 8.8$               |
| <b>L1</b> | Pearlite and Ferrite                                 | $16.8 \pm 3.9$               |
|           | Ferrite                                              | $31.3 \pm 9.3$               |
|           | Pearlite and Cementite                               | $15.8 \pm 1.2$               |
|           | Martensite and Cementite                             | $27.8 \pm 2.3$               |
|           | Martensite                                           | $22.9 \pm 2.1$               |

**Table S2.** Grain size of the blade G8 estimated on 200x LOM micrographs according to the different microstructure observed

| Sample     | Microstructure                           | Grain size ( $\mu\text{m}$ ) |
|------------|------------------------------------------|------------------------------|
| <b>G8</b>  |                                          |                              |
| <b>P2</b>  | Widmanstätten like ferrite               | 19.1 $\pm$ 2.9               |
|            | Pearlite                                 | 7.6 $\pm$ 3.4                |
|            | Ferrite                                  | 10.8 $\pm$ 2.1               |
| <b>E2</b>  | Ferrite                                  | 10.2 $\pm$ 1.9               |
|            | Ferrite and Pearlite                     | 15.5 $\pm$ 3.2               |
| <b>I2</b>  | Ferrite                                  | 9.9 $\pm$ 1.7                |
|            | Ferrite and Pearlite                     | 16.1 $\pm$ 1.2               |
|            | Pearlite and Widmanstätten like ferrite  | 31.3 $\pm$ 10.1              |
|            | Pearlite and cementite                   | 12.7 $\pm$ 0.9               |
| <b>L2I</b> | Ferrite                                  | 8.1 $\pm$ 2.3                |
|            | Ferrite and Pearlite                     | 21.5 $\pm$ 6.5               |
|            | Pearlite and Widmanstätten like ferrite. | 12.2 $\pm$ 7.8               |
|            | Pearlite and Cementite                   | 14.1 $\pm$ 2.3               |
|            | Martensite                               | 13.6 $\pm$ 1.6               |
| <b>L2P</b> | Ferrite                                  | 19.5 $\pm$ 3.1               |
|            | Ferrite and Pearlite                     | 35.5 $\pm$ 8.1               |
|            | Martensite                               | 8.8 $\pm$ 1.5                |

**Table S3.** Microhardness profile of samples L1 and L2I.

| Site of measurement | Description                             | Microhardness<br>(HV 0.5) |
|---------------------|-----------------------------------------|---------------------------|
| <i>L1</i>           |                                         |                           |
| 1                   | Martensitic edge                        | 583±52                    |
| 2                   | center                                  | 420±32                    |
| 3                   | Hypereutectoid steel                    | 620±25                    |
| <i>L2</i>           |                                         |                           |
| 1                   | Martensite and lower bainite            | 532±34                    |
| 2                   | pearlite                                | 323±23                    |
| 3                   | pearlite and ferrite                    | 144±10                    |
| 4                   | pearlite and Widmanstätten like ferrite | 250±19                    |
| 5                   | pearlite and ferrite                    | 153±12                    |
| 6                   | pearlite and Widmanstätten like ferrite | 259±20                    |
